# Supplementary material for: In situ formed VOOH nanosheet arrays anchored on a Ti3C2Tx MXene as a highly efficient and robust synergistic electrocatalyst for boosting water oxidation and reduction
Source: Royal Society of Chemistry journal article supplement (doi:10.1039/d0ta09410b), 2020-01-01
Supplement: d0ta09410b1.pdf [file d0ta09410b1.pdf]

## Supporting Information

### **In-situ formed VOOH nanosheet arrays anchored on $\text{Ti}_3\text{C}_2\text{T}_x$ MXene as a highly efficient and robust synergistic electrocatalyst for boosting water oxidation and reduction**

Liang Yan,<sup>\*a,b</sup> Xuanwei Chen,<sup>a</sup> Xiaojun Liu,<sup>a</sup> Liping Chen<sup>a</sup> and Bing Zhang<sup>c</sup>

<sup>a</sup> School of Chemistry and Materials Engineering, Huizhou University, No. 46 Yanda Road, Huizhou, 516007, China.

<sup>b</sup> Guangdong Provincial Key Laboratory for Electronic Functional Materials and Devices, Huizhou University, No. 46 Yada Road, Huizhou, 516007, China.

<sup>c</sup> School of Materials and Energy, Guangdong University of Technology, Guangzhou Higher Education Mega Center, No. 100 Waihuan Xi Road, Guangzhou, 510006, China.

<sup>\*</sup> Corresponding author.

E-mail address: yanliang@hzu.edu.cn

## Experimental Section

*Chemicals and Materials:* Ammonium vanadate ( $\text{NH}_4\text{VO}_3$ ), hydrazine hydrate ( $\text{N}_2\text{H}_4\cdot\text{H}_2\text{O}$ ), hydrochloric acid (HCl), lithium fluoride (LiF, 99%), and anhydrous ethanol ( $\text{C}_2\text{H}_5\text{OH}$ , >99.5%) were obtained from Aladdin Reagents Ltd. The commercial Pt/C (20 wt% Pt on Vulcan XC-72R) was purchased from Johnson Matthey, while commercial  $\text{IrO}_2$  was purchased from Alfa Aesar. Nafion (5 wt%) was purchased from Sigma-Aldrich. Carbon paper (CP, #60, 0.19 mm in thickness) was bought from Toray Industries, Inc. and washed sequentially with acetone, ethanol and deionized (DI) water before use. All the chemicals were used as received without further purification.

*Preparation of  $\text{Ti}_3\text{C}_2\text{T}_x$  MXene nanosheets:*  $\text{Ti}_3\text{AlC}_2$  powders (> 99.5 wt % purity) were bought from 11 Technology Co., Ltd.  $\text{Ti}_3\text{C}_2\text{T}_x$  MXene nanosheets were synthesized via etching the  $\text{Ti}_3\text{AlC}_2$  powder with HF. Typically, 1.0 g of LiF was dissolved in 20.0 mL of 9.0 M HCl solution and stirred for 30 min, then 1.0 g of  $\text{Ti}_3\text{AlC}_2$  powder was slowly added into the aforementioned solution and the mixed solution was kept stirring at 35 °C for 24 h. Afterward, the resulting suspension was washed with DI water for several times until the neutral pH ( $\geq 6$ ) was obtained. The collected powder was ultrasonicated in 200 mL of DI water for 1 h under continuous Ar purging. The obtained aqueous solution containing monolayer or few-layer  $\text{Ti}_3\text{C}_2\text{T}_x$  MXene nanosheets was centrifuged at 3500 rpm for 1 h and the supernatant was freeze-dried to obtain  $\text{Ti}_3\text{C}_2\text{T}_x$  MXene powder.

*Synthesis of VOOH nanosheet arrays on  $Ti_3C_2T_x$  MXene nanosheets:* In a typical synthesis, 30 mg of  $Ti_3C_2T_x$  MXene powder was first dispersed in 15 mL of deoxygenated DI water by ultrasonic treatment 1 h under the protection of Ar. Meantime, 2 mM of  $NH_4VO_3$  was dissolved in 20 mL of DI water to obtain a homogeneous solution. Then, the obtained  $Ti_3C_2T_x$  MXene suspension was added into the  $NH_4VO_3$  solution under stirring, and the mixed solution was keeping stirred at room temperature for 1 h under the protection of Ar. HCl (1 mL 1 M) and  $N_2H_4 \cdot H_2O$  (1 mL) were then dropwise added in turn to the above mixture solution and continuous magnetic stirring for 30 min under the protection of Ar. Afterwards, the obtained solution was poured into a 50 mL Teflon-lined stainless-steel autoclave and reacted at 160 °C for 8 h. After cooling down to room temperature, the resulting products were thoroughly washed with deoxygenated DI water and ethanol several times and then freeze-dried overnight. Finally, the obtained VOOH/ $Ti_3C_2T_x$  MXene (164.4 mg) was collected and then stored at 0 °C in Ar-filled bottles before use. For comparison, bare VOOH was synthesized using a similar procedure to that of VOOH/ $Ti_3C_2T_x$  MXene except that no  $Ti_3C_2T_x$  MXene was added.

*Material characterizations:* The XRD patterns were recorded on a D8 Advance X-ray powder diffractometer with Cu K $\alpha$  radiation ( $\lambda = 1.54 \text{ \AA}$ ) as the X-ray source. Surface Morphology and microstructure of the samples were characterized by field emission scanning electron microscopy (FESEM, Hitachi SU8220) and field emission transmission electron microscope (FETEM, FEI Talos F200S). Surface chemistry and elemental composition were characterized by X-ray photoelectron spectroscopy (XPS,

Thermo Fisher ESCALAB 250Xi) with Al K $\alpha$  radiation. Raman spectra were carried out on a LabRAM HR Evolution Raman microscope with 532 nm wavelength excitation laser. N<sub>2</sub> adsorption-desorption isotherms were measured by the Brunauer-Emmett-Teller (BET, Micrometrics ASAP 2460) method. Weight ratio of V and Ti elements in the sample were analyzed by inductively coupled plasma optical emission spectroscopy (ICP-OES, Optima 4300DV).

*Electrochemical Measurements:* All electrochemical measurements were performed on a PGSTAT302N potentiostat/galvanostat (Metrohm Autolab, Netherlands) workstation equipped with a three-electrode setup. A glassy-carbon (GC) rotating disk electrode (RDE) (d = 5.0 mm) was used as working electrode, while a reversible hydrogen electrode (RHE) and a graphite rod were used as the reference and counter electrodes, respectively. First, the catalyst ink was prepared by ultrasonically dispersing the mixture of the catalyst (5 mg), ethanol (500  $\mu$ L), deionized water (490  $\mu$ L) and Nafion (10  $\mu$ L, 5 wt%) for 30 min to form a uniform suspension. Next, 10  $\mu$ L of the catalyst dispersion was then carefully dropped onto a GC electrode and dried under atmospheric conditions. For comparison, the commercial IrO<sub>2</sub> and Pt/C (20%) with the similar mass loading were also prepared as benchmark OER and HER catalysts, respectively. Prior to the measurement, the electrolyte (1.0 M KOH) was purged with high purity O<sub>2</sub> or Ar flow for 30 min and maintained during the measurement to ensure continuous gas saturation. Linear sweep voltammograms (LSV) for both OER and HER were measured at a scan rate of 5 mV s<sup>-1</sup> and corrected with 95% *iR* compensation. The electrochemical double-layer capacitance (*C*<sub>dl</sub>) was

measured from cyclic voltammogram method in a potential range without apparent faradaic process at various scan rates ranging from 10 to 100 mV s<sup>-1</sup>. Electrochemical impedance spectra (EIS) measurements were carried out over a frequency range from 0.1 Hz to 100 kHz by applying an AC potential with 5 mV amplitude. The long-term stability was recorded by a chronopotentiometry measurement at a constant current density of  $\pm 10$  mA cm<sup>-2</sup>. The overall water splitting measurement was carried out in a two-electrode system using the VOOH/Ti<sub>3</sub>C<sub>2</sub>T<sub>x</sub> MXene as a bifunctional catalyst with a loading of 2 mg cm<sup>-2</sup> on CP as both the cathode and anode in Ar-saturated 1.0 M KOH. For comparison, the physical mixture of VOOH and Ti<sub>3</sub>C<sub>2</sub>T<sub>x</sub> MXene (denoted as VOOH@Ti<sub>3</sub>C<sub>2</sub>T<sub>x</sub> MXene) was prepared by mechanically mixing VOOH powders (134.4 mg) and Ti<sub>3</sub>C<sub>2</sub>T<sub>x</sub> MXene (30 mg) in an argon-filled glovebox using a mortar at room temperature. The catalytic performance of VOOH@Ti<sub>3</sub>C<sub>2</sub>T<sub>x</sub> MXene was also tested for better comparison.

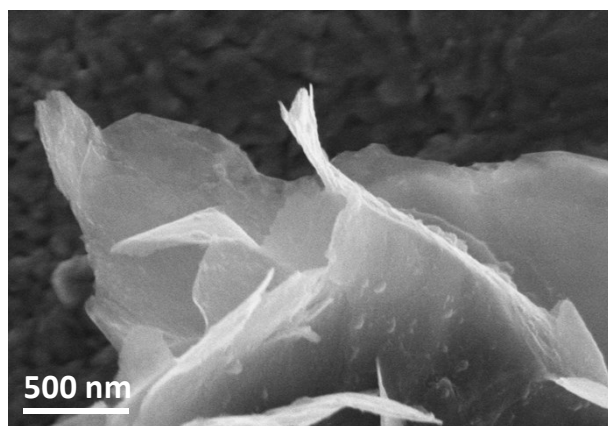

**Figure S1.** SEM image of  $\text{Ti}_3\text{C}_2\text{T}_x$  Mxene.

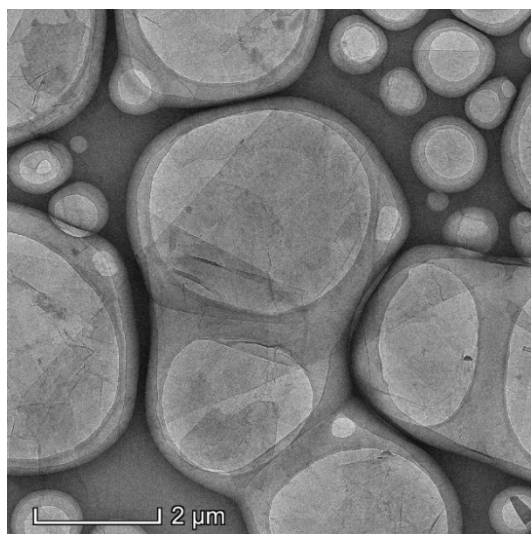

**Figure S2.** TEM image of  $\text{Ti}_3\text{C}_2\text{T}_x$  Mxene.

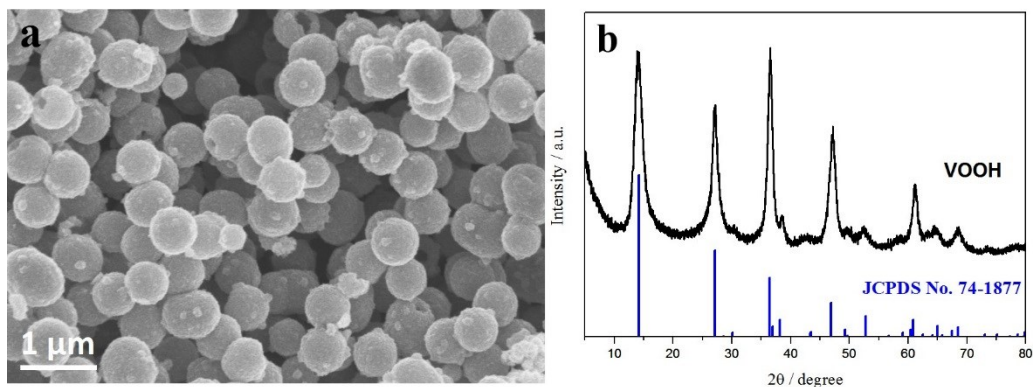

**Figure S3.** (a) SEM image and (b) the XRD pattern of VOOH.

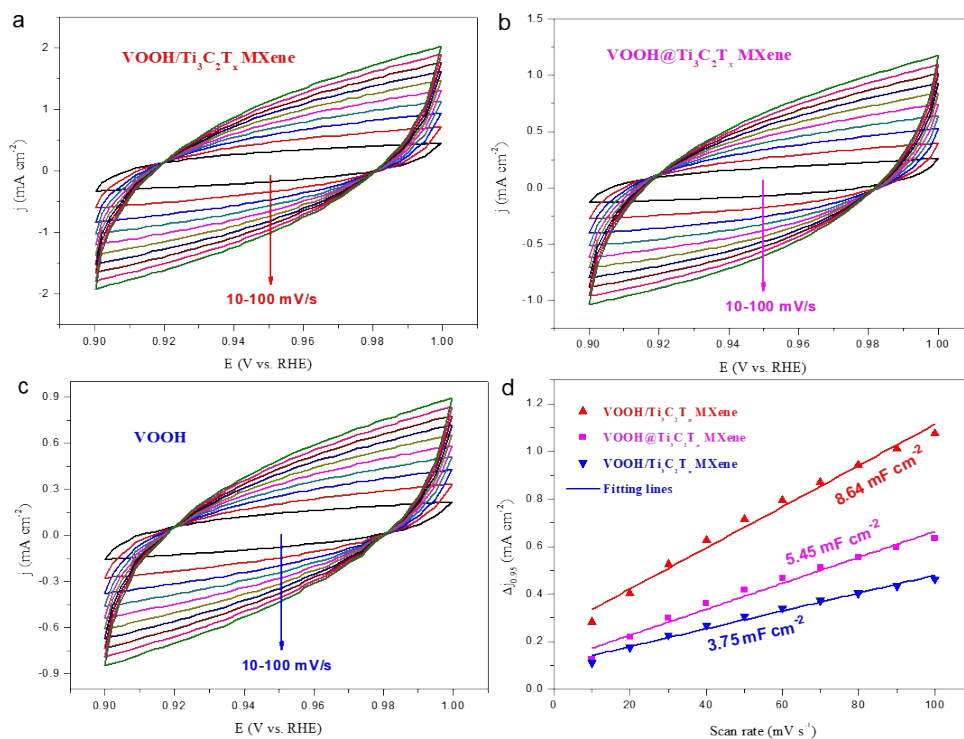

**Figure S4.** CV curves for (a) VOOH/Ti<sub>3</sub>C<sub>2</sub>T<sub>x</sub> MXene, (b) VOOH@Ti<sub>3</sub>C<sub>2</sub>T<sub>x</sub> MXene and (c) VOOH at different scan rates (10-100 mV s<sup>-1</sup>). (d) The *C*<sub>dl</sub> value of VOOH/Ti<sub>3</sub>C<sub>2</sub>T<sub>x</sub> MXene, VOOH@Ti<sub>3</sub>C<sub>2</sub>T<sub>x</sub> MXene and VOOH.

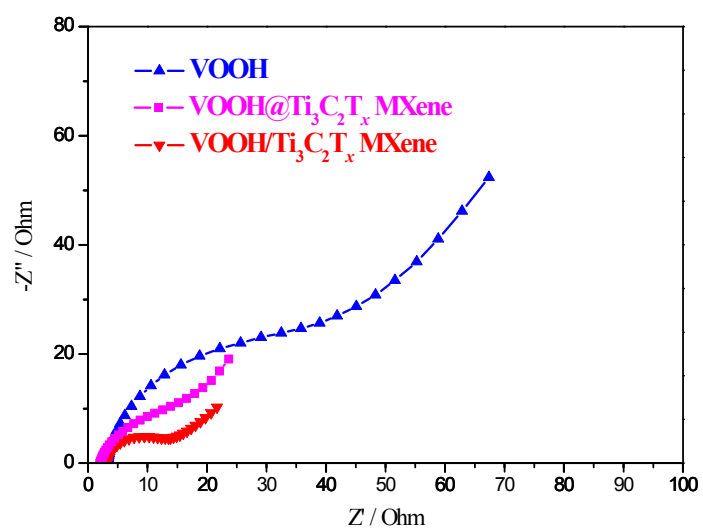

**Figure S5.** EIS Nyquist Plots of VOOH, VOOH@Ti<sub>3</sub>C<sub>2</sub>T<sub>x</sub> MXene and VOOH/Ti<sub>3</sub>C<sub>2</sub>T<sub>x</sub> MXene for OER.



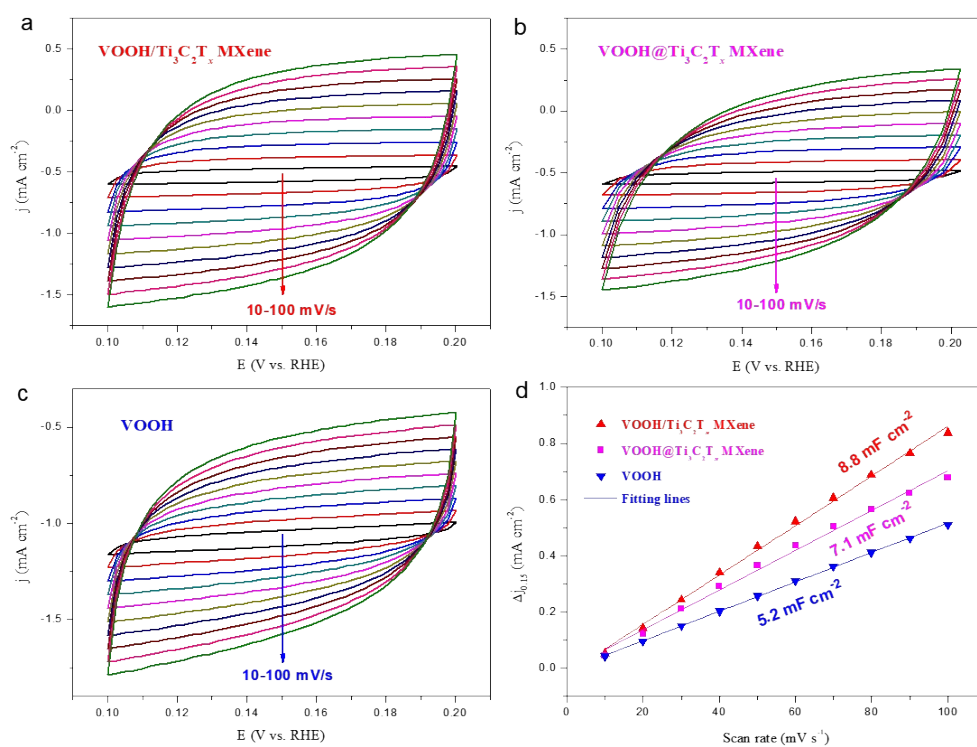

**Figure S6.** CV curves for (a) VOOH/Ti<sub>3</sub>C<sub>2</sub>T<sub>x</sub> MXene, (b) VOOH@Ti<sub>3</sub>C<sub>2</sub>T<sub>x</sub> MXene and (c) VOOH at different scan rates (10-100 mV s<sup>-1</sup>). (d) The  $C_{dl}$  value of VOOH/Ti<sub>3</sub>C<sub>2</sub>T<sub>x</sub> MXene, VOOH@Ti<sub>3</sub>C<sub>2</sub>T<sub>x</sub> MXene and VOOH.

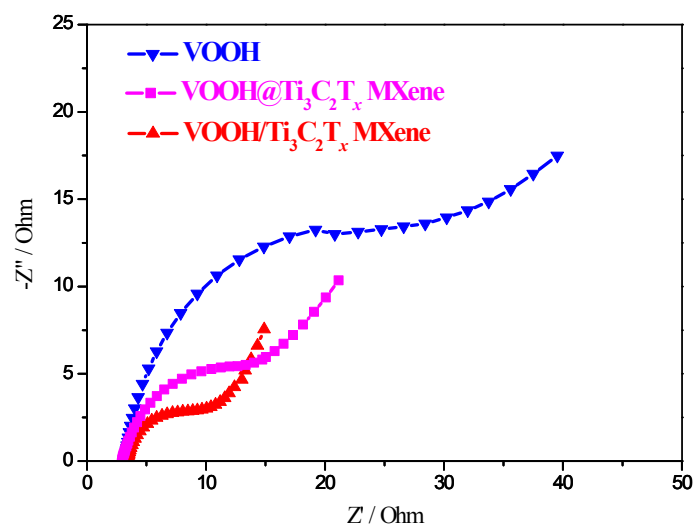

**Figure S7.** EIS Nyquist Plots of VOOH, VOOH@Ti<sub>3</sub>C<sub>2</sub>T<sub>x</sub> MXene and VOOH/Ti<sub>3</sub>C<sub>2</sub>T<sub>x</sub> MXene for HER.

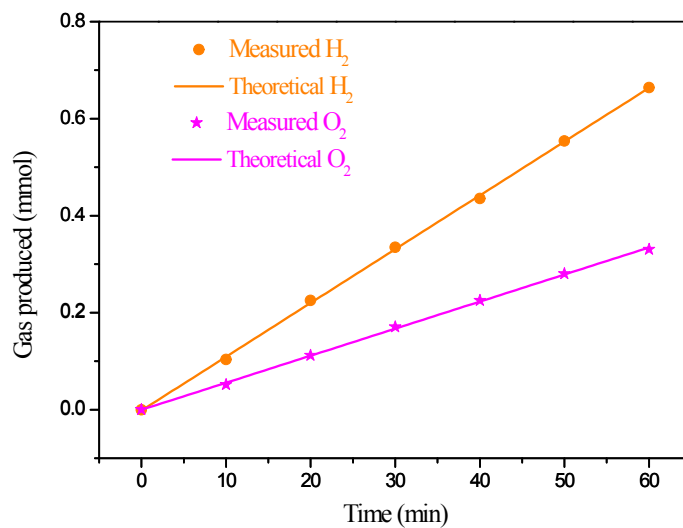

**Figure S8.** Amount of gas theoretically calculated and experimentally measured vs. time for overall water splitting of VOOH/Ti<sub>3</sub>C<sub>2</sub>T<sub>x</sub> MXene.

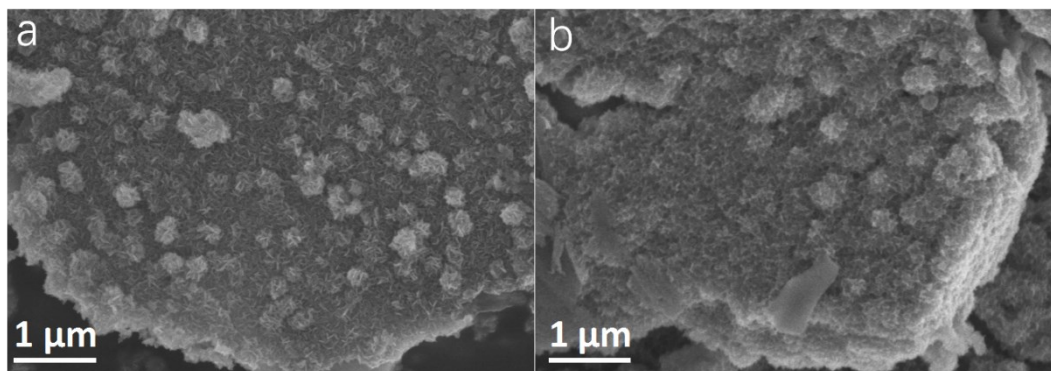

**Figure S9.** SEM images of VOOH/Ti<sub>3</sub>C<sub>2</sub>T<sub>x</sub> MXene after (a) HER and (b) OER measurements.

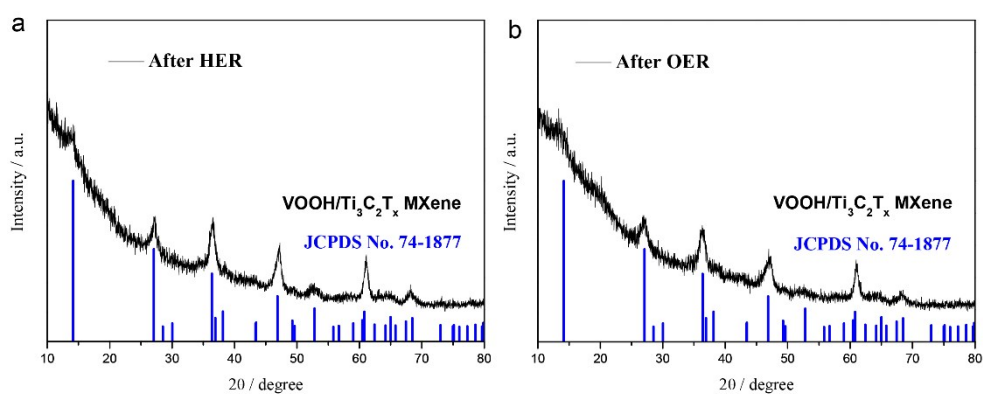

**Figure S10.** XRD pattern of VOOH/Ti<sub>3</sub>C<sub>2</sub>T<sub>x</sub> MXene after (a) HER and (b) OER measurements.

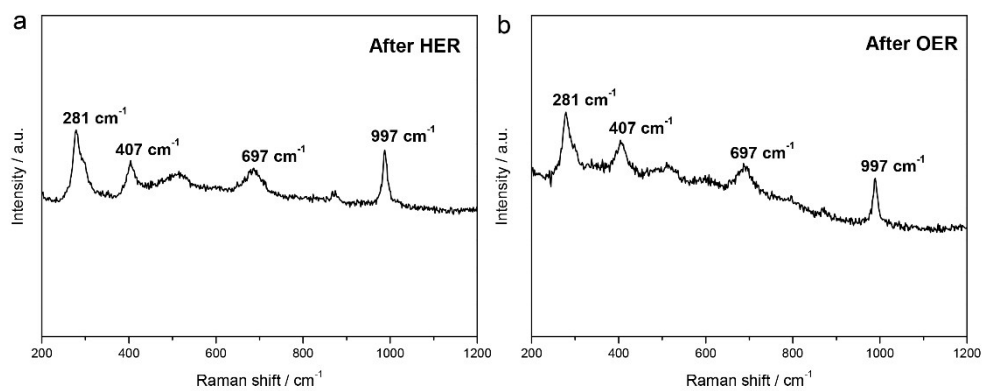

**Figure S11.** Raman spectra of VOOH/Ti<sub>3</sub>C<sub>2</sub>T<sub>x</sub> Mxene after (a) HER and (b) OER measurements.

**Table S1.** A comparison of OER performances of VOOH/Ti<sub>3</sub>C<sub>2</sub>T<sub>x</sub> Mxene with recently reported electrocatalysts in 1.0 M KOH.

| Catalyst                                                              | $\eta$ (mV) at<br>10 mA cm <sup>-2</sup> | Tafel slope<br>mV dec <sup>-1</sup> | Reference                                            |
|-----------------------------------------------------------------------|------------------------------------------|-------------------------------------|------------------------------------------------------|
| $\gamma$ -CoOOH nanosheet                                             | 300                                      | 38                                  | <i>Angew. Chem. Int. Ed.</i> <b>2015</b> , 54, 8722  |
| NiPS <sub>3</sub> @NiOOH                                              | 350 <sup>a</sup>                         | 80                                  | <i>ACS Catal.</i> <b>2017</b> , 7, 229               |
| Fe-CoOOH/G                                                            | 330                                      | 37                                  | <i>Adv. Energy Mater.</i> <b>2017</b> , 7, 1602148   |
| VOOH                                                                  | 270                                      | 68                                  | <i>Angew. Chem. Int. Ed.</i> <b>2017</b> , 56, 573   |
| F-CoOOH/NF                                                            | 270                                      | 54                                  | <i>Angew. Chem. Int. Ed.</i> <b>2018</b> , 57, 15471 |
| Zn-CoOOH/NF                                                           | 270                                      | 44                                  | <i>Nano Energy</i> <b>2018</b> , 53, 144             |
| $\delta$ -FeOOH NSs/NF                                                | 265                                      | 68                                  | <i>Adv. Mater.</i> <b>2018</b> , 30, 1803144         |
| Co-Bi/Ti <sub>3</sub> C <sub>2</sub> T <sub>x</sub> MXene             | 250                                      | 53                                  | <i>ChemSusChem</i> <b>2018</b> , 11, 3758            |
| BP QDs/MXene                                                          | 360                                      | 64.3                                | <i>J. Mater. Chem. A</i> <b>2018</b> , 6, 21255      |
| Co <sub>3</sub> O <sub>4</sub> QDs/MXene                              | 340                                      | 63.97                               | <i>Chem. Commun.</i> <b>2019</b> , 55, 1237          |
| CoP/Ti <sub>3</sub> C <sub>2</sub> MXene                              | 230                                      | 50                                  | <i>J. Mater. Chem. A</i> <b>2019</b> , 7, 27383      |
| NiFe-LDH/MXene/NF                                                     | 229                                      | 43                                  | <i>Nano Energy</i> <b>2019</b> , 63, 103880          |
| Ti <sub>3</sub> C <sub>1.6</sub> N <sub>0.4</sub>                     | 450                                      | 216.4                               | <i>Nanoscale Adv.</i> <b>2020</b> , 2, 1187          |
| M <sub>3</sub> OOH@V <sub>4</sub> C <sub>3</sub> T <sub>x</sub> MXene | 275.2                                    | 51.4                                | <i>InfoMat.</i> <b>2020</b> , 2, 1                   |
| FeOOH NSs/Ti <sub>3</sub> C <sub>2</sub> MXene                        | 400                                      | 95                                  | <i>ChemistrySelect</i> <b>2020</b> , 5, 1890         |
| Co <sub>3</sub> O <sub>4</sub> /MXene                                 | 300                                      | 118                                 | <i>Sci. Bull.</i> <b>2020</b> , 65, 460              |
| FeCo-LDH/MXene                                                        | 268                                      | 85                                  | <i>ChemNanoMat</i> <b>2020</b> , 6, 154              |
| VOOH/Ti <sub>3</sub> C <sub>2</sub> T <sub>x</sub> Mxene              | 238                                      | 81.6                                | This work                                            |

a: 0.1 M KOH

**Table S2.** A comparison of HER performances of VOOH/Ti<sub>3</sub>C<sub>2</sub>T<sub>x</sub> Mxene with recently reported electrocatalysts in 1.0 M KOH.

| Catalyst                                                   | $\eta$ (mV) at<br>10 mA cm <sup>-2</sup> | Tafel slope<br>mV dec <sup>-1</sup> | Reference                                           |
|------------------------------------------------------------|------------------------------------------|-------------------------------------|-----------------------------------------------------|
| VOOH                                                       | 164                                      | 104                                 | <i>Angew. Chem. Int. Ed.</i> <b>2017</b> , 56, 573  |
| Cu@CoFe LDH                                                | 171                                      | 36.4                                | <i>Nano Energy</i> <b>2017</b> , 41, 327            |
| BP QDs/MXene                                               | 190                                      | 83                                  | <i>J. Mater. Chem. A</i> <b>2018</b> , 6, 21255     |
| CoP@3D Ti <sub>3</sub> C <sub>2</sub> -MXene               | 168                                      | 58                                  | <i>ACS Nano</i> <b>2018</b> , 12, 8017              |
| Co-Fe oxyphosphide                                         | 180                                      | 62                                  | <i>Adv. Sci.</i> <b>2019</b> , 6, 1900576           |
| FeCoNi (Oxy)hydroxide                                      | 150                                      | 107                                 | <i>Adv. Energy Mater.</i> <b>2019</b> , 9, 1901312  |
| NiS <sub>2</sub> /V-MXene                                  | 179                                      | 85                                  | <i>J. Catal.</i> <b>2019</b> , 375, 8               |
| CoP/Ti <sub>3</sub> C <sub>2</sub> MXene                   | 113                                      | 57                                  | <i>J. Mater. Chem. A</i> <b>2019</b> , 7, 27383     |
| NiFe-LDH/MXene/NF                                          | 132                                      | 70                                  | <i>Nano Energy</i> <b>2019</b> , 63, 103880         |
| VS <sub>2</sub> @V <sub>2</sub> C MXene                    | 164                                      | 47.6                                | <i>Nanoscale</i> <b>2020</b> , 12, 6176             |
| Co <sup>3+</sup> @3D-Nb <sub>2</sub> CT <sub>x</sub> MXene | 236                                      | 123                                 | <i>Adv. Sci.</i> <b>2020</b> , 7, 1903680           |
| MoS <sub>2</sub> @Mo <sub>2</sub> CT <sub>x</sub>          | 176                                      | 207                                 | <i>CrystEngComm</i> <b>2020</b> , 22, 1395          |
| IrCo@ac-Ti <sub>3</sub> C <sub>2</sub>                     | 135                                      | 56                                  | <i>ChemSusChem</i> <b>2020</b> , 13, 945            |
| 2.5% Pt@2D MXene                                           | 103                                      | 52                                  | <i>Adv. Funct. Mater.</i> <b>2020</b> , 30, 1910028 |
| VOOH/Ti <sub>3</sub> C <sub>2</sub> T <sub>x</sub> Mxene   | 100                                      | 81.8                                | This work                                           |

**Table S3.** A comparison of VOOH/Ti<sub>3</sub>C<sub>2</sub>T<sub>x</sub> Mxene with recently reported bifunctional electrocatalysts in the performance for overall water splitting.

| Catalyst                                                                                                                    | Potential (V) at<br>10 mA cm <sup>-2</sup> | Reference                                                 |
|-----------------------------------------------------------------------------------------------------------------------------|--------------------------------------------|-----------------------------------------------------------|
| VOOH                                                                                                                        | 1.62                                       | <i>Angew. Chem. Int. Ed.</i> <b>2017</b> , 56, 573        |
| δ-FeOOH NSs/NF                                                                                                              | 1.62                                       | <i>Adv. Mater.</i> <b>2018</b> , 30, 1803144              |
| BP QDs/MXene                                                                                                                | 1.78                                       | <i>J. Mater. Chem. A</i> <b>2018</b> , 6, 21255           |
| Ni <sub>0.7</sub> Fe <sub>0.3</sub> PS <sub>3</sub> @MXene   <br>Ni <sub>0.9</sub> Fe <sub>0.1</sub> PS <sub>3</sub> @MXene | 1.65                                       | <i>Adv. Energy Mater.</i> <b>2018</b> , 8, 1801127        |
| CoP@3D Ti <sub>3</sub> C <sub>2</sub> -MXene                                                                                | 1.565                                      | <i>ACS Nano</i> <b>2018</b> , 12, 8017                    |
| CoP/MXene                                                                                                                   | 1.56                                       | <i>J. Mater. Chem. A</i> <b>2019</b> , 7, 27383           |
| γ-CrOOH/NF                                                                                                                  | 1.56                                       | <i>Inorg. Chem.</i> <b>2019</b> , 58, 4014                |
| NiFe-LDH/MXene/NF                                                                                                           | 1.51                                       | <i>Nano Energy</i> <b>2019</b> , 63, 103880               |
| 1T/2H MoSe <sub>2</sub> /MXene                                                                                              | 1.64                                       | <i>Electrochim. Acta</i> <b>2019</b> , 326, 134976        |
| Ni <sub>3</sub> S <sub>2</sub> @MoS <sub>2</sub> /FeOOH                                                                     | 1.57                                       | <i>Appl. Catal. B: Environ.</i> <b>2019</b> , 244, 1004   |
| FeOOH/Ni <sub>3</sub> N/CC                                                                                                  | 1.58                                       | <i>Appl. Catal. B: Environ.</i> <b>2020</b> , 269, 118600 |
| Ni <sub>0.8</sub> Fe <sub>0.2</sub> -AHNA  Ni                                                                               | 1.41                                       | <i>Energy Environ. Sci.</i> <b>2020</b> , 13, 86          |
| VOOH/Ti <sub>3</sub> C <sub>2</sub> T <sub>x</sub> Mxene                                                                    | 1.579                                      | This work                                                 |
